# Supplementary material for: Combined Physio-Biochemical and Transcriptome Analyses Illuminate the Resistance Response of Rice Priming with Decoyinine against Nilaparvata lugens
Source: MDPI journal article supplement (doi:10.3390/agronomy12123098), 2022-12-07
Supplement: s1 [file s1]

**Table S1** Primers used in qRT-PCR for validation of DEGs

| Gene ID      | Primer name     | Forward primer       | Reverse primer       |
|--------------|-----------------|----------------------|----------------------|
| LOC4332755   | OsWRKYTV        | CGTCGATGACTTCTTCCCGT | CGTTGTGTAAATCCGTCCGC |
| LOC107277481 | OsWRKYSUSIBA2   | AGCTGCAGACGACAACATCA | GGGGTACATGGCACCTTCAA |
| LOC4347070   | OsWRKY62        | CTTACTTCCGCTGCGCATTC | TGAAACCTCGTGCGCATAGT |
| LOC4347069   | OsWRKY76        | TCCGAATGCTTTTCTGCTGC | CCGATAGAAGCCCGCAATCT |
| LOC9271617   | OsCYP450 87A3   | ACCAAGGATCGAGGTGCAAG | ATCGAACAGCAGTGGATCGG |
| LOC4326660   | OsCYP450 72A15  | TTGTACCCACCAGCCGTAAC | AATCACACCAGCCGGGTAAG |
| LOC4349113   | OsCYP450 89A2   | CATCAAGCTCTGCTCCGAGT | TGGATGGGTTCTTGACCAGC |
| LOC4324604   | OsCYP45072A15-1 | TCTTCCCGTGCTGTTCATCC | CACCCGGATCCTTAGATGCC |
| LOC4328073   | OsCAT A         | GGACGAGGAGGTGGACTACT | TGCTTGTGTATCGTCGCCTT |
| LOC4342124   | OsCAT B         | GTTGTTGCAGTGTGATGCGT | TTCCTCCTGGCCGATCTACA |
| LOC4346329   | OsSOD           | CTTGACGGCCAGGATTCAT  | AAGTGCCTGACCTGACGATG |
| LOC4324556   | OsPOD           | ACTTCCACGACTGCTTCGTC | GACTTGCGGAGGGTCTTGTT |
| LOC4340315   | OsCalS5         | AGACGAGGCTGCTCTTCAAC | CACTTGGTGGACTTTGTGCG |
| LOC4329889   | OsG6PD          | CGTGGGAGATCTTCACTCCG | CCAAACGTAGCCATGGGTCT |
| LOC4349207   | OsGSTU6         | AACGAAAGGGCCACGAAAGA | CAGCCACACCATTTAGCAGC |
| LOC4336415   | OsPAL           | CTCGTCCGCATCAACACTCT | GTCACGTTGGCGTTAAGCAG |
| AK059694.1   | OsUbq           | GCAGGCATCTAGAGCTAGGC | AAAAGGTGTCTCCGAAGGGC |

**Table S2** Three-way ANOVA for significance (*P* value) of the effects of DCY treatment, BPH infestation and infestation time on rice physiological parameters.

|                                            | DCY       | BPH         | Infestation |        |        |        |       |
|--------------------------------------------|-----------|-------------|-------------|--------|--------|--------|-------|
|                                            | treatment | infestation | time        | A×B    | A×C    | B×C    | A×B×C |
|                                            | (A)       | (B)         | (C)         |        |        |        |       |
| MDA <sup>a</sup>                           | <0.001    | <0.001      | <0.001      | <0.001 | 0.002  | <0.001 | 0.001 |
| H <sub>2</sub> O <sub>2</sub> <sup>a</sup> | 0.011     | <0.001      | <0.001      | <0.001 | 0.08   | 0.001  | 0.11  |
| CAT <sup>b</sup>                           | 0.001     | <0.001      | 0.003       | <0.001 | 0.332  | 0.059  | 0.6   |
| SOD <sup>b</sup>                           | 0.002     | <0.001      | 0.012       | <0.001 | 0.947  | 0.061  | 0.966 |
| POD <sup>b</sup>                           | <0.001    | <0.001      | <0.001      | <0.001 | 0.334  | 0.222  | 0.7   |
| GST <sup>b</sup>                           | 0.085     | 0.096       | 0.132       | 0.054  | 0.536  | 0.218  | 0.444 |
| PPO <sup>b</sup>                           | <0.001    | 0.069       | 0.29        | 0.003  | <0.001 | 0.105  | 0.29  |
| PAL <sup>b</sup>                           | 0.075     | 0.871       | 0.133       | 0.075  | 0.894  | 0.002  | 0.894 |
| Soluble<br>sugar <sup>a</sup>              | <0.001    | <0.001      | 0.102       | <0.001 | 0.734  | <0.001 | 0.656 |
| Sucrose <sup>a</sup>                       | <0.001    | <0.001      | <0.001      | 0.005  | 0.059  | <0.001 | 0.125 |
| Glucose <sup>a</sup>                       | 0.054     | <0.001      | 0.012       | 0.085  | 0.125  | <0.001 | 0.018 |
| Free amino<br>acid <sup>a</sup>            | 0.153     | 0.727       | 0.423       | 0.045  | 0.011  | 0.818  | 0.182 |
| Flavonoid <sup>a</sup>                     | 0.001     | 0.687       | 0.076       | 0.008  | 0.784  | 0.035  | 0.763 |
| Callose <sup>a</sup>                       | <0.001    | <0.001      | <0.001      | 0.983  | 0.008  | 0.188  | 0.011 |

<sup>a</sup> Concentrations measured, <sup>b</sup> Activities measured. DCY treatment at 50 mg/L solution, BPH infestation time: 0, 24, 48, 72 or 96 h. Significant differences at *P* < 0.05.

**Table S3** RNA-seq data of twelve samples

| sample | Raw reads | Raw bases | Clean reads | Clean bases | Total map        | Unique map       | Error rate % | Q30%  | GC %  |
|--------|-----------|-----------|-------------|-------------|------------------|------------------|--------------|-------|-------|
| C1     | 45367978  | 6.81G     | 44451764    | 6.67G       | 41383008(93.1%)  | 40478847(91.06%) | 0.03         | 93.94 | 52.17 |
| C2     | 50126634  | 7.52G     | 49209380    | 7.38G       | 46059401(93.6%)  | 45016173(91.48%) | 0.03         | 94.23 | 51.5  |
| C3     | 48228428  | 7.23G     | 47126368    | 7.07G       | 44084984(93.55%) | 43129802(91.52%) | 0.03         | 94.17 | 52.95 |
| CB1    | 55325630  | 8.3G      | 54164088    | 8.12G       | 49788754(91.92%) | 48696401(89.91%) | 0.03         | 93.46 | 53.36 |
| CB2    | 46346280  | 6.95G     | 45276496    | 6.79G       | 41493122(91.64%) | 40518990(89.49%) | 0.03         | 94.05 | 52.28 |
| CB3    | 46861604  | 7.03G     | 45472892    | 6.82G       | 41699059(91.7%)  | 40787736(89.7%)  | 0.03         | 93.98 | 52.9  |
| D1     | 45849684  | 6.88G     | 44204352    | 6.63G       | 40971574(92.69%) | 40064564(90.63%) | 0.03         | 93.68 | 54.57 |
| D2     | 45391366  | 6.81G     | 44103322    | 6.62G       | 40793903(92.5%)  | 39968343(90.62%) | 0.03         | 93.89 | 54.06 |
| D3     | 47353182  | 7.1G      | 45033294    | 6.75G       | 41673437(92.54%) | 40838696(90.69%) | 0.03         | 94.06 | 53.86 |
| DB1    | 46071824  | 6.91G     | 44401654    | 6.66G       | 40789300(91.86%) | 39871622(89.8%)  | 0.03         | 93.64 | 54.04 |
| DB2    | 43495248  | 6.52G     | 40782836    | 6.12G       | 37277825(91.41%) | 36374586(89.19%) | 0.03         | 94.12 | 49.27 |
| DB3    | 42563208  | 6.38G     | 40989514    | 6.15G       | 37552649(91.62%) | 36547755(89.16%) | 0.03         | 93.83 | 53.52 |

C: Control, CB: Control + BPH, D: DCY, DB: DCY+ Control.

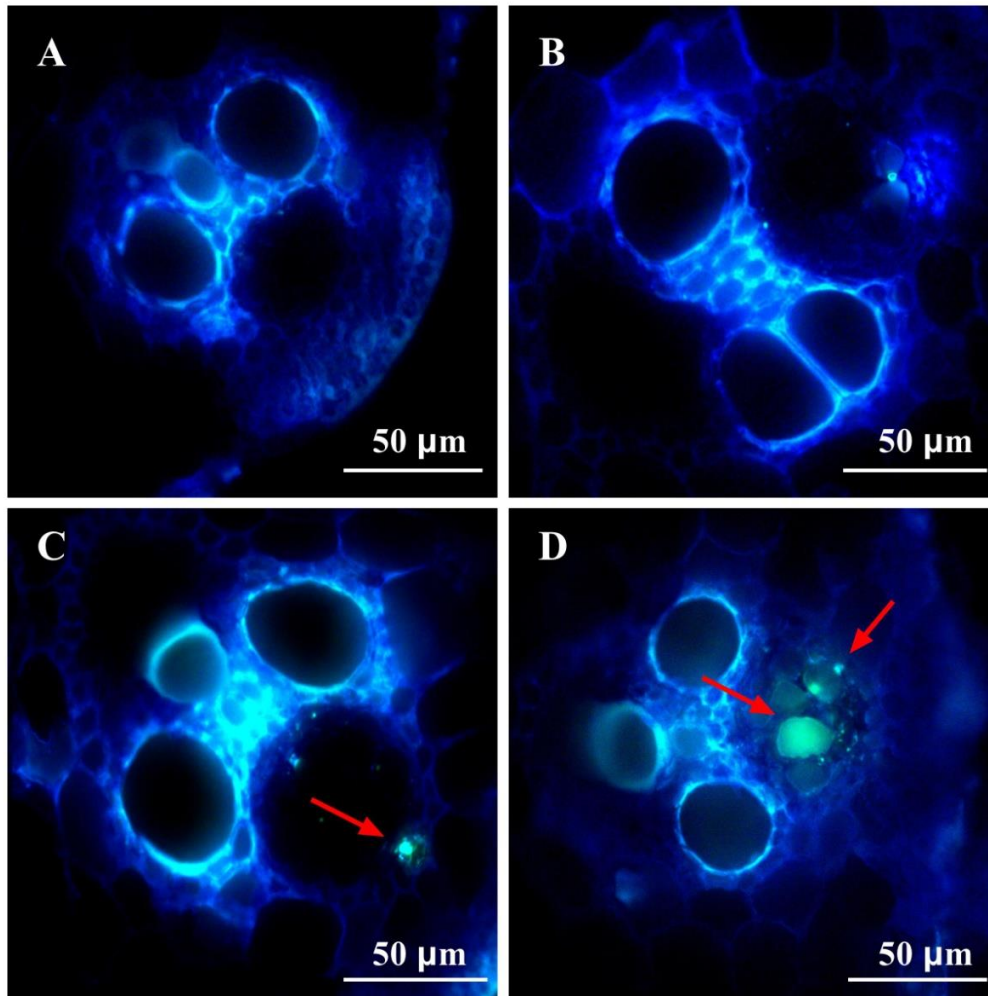

**Figure S1.** Callose deposition in rice leaf sheaths.

Callose deposition of (A) Control group, (B) Control + BPH group, (C) DCY group, and (D) DCY + BPH group in rice leaf sheaths for 48h.

Note: Callose deposits in leaf sheath tissue of rice in the figure are all taken under fluorescence microscope at 400 times, and bright yellow-green spots are callose. The scale is 50μm.
